# Supplementary material
Source: publisher site journal article supplement (https://www.dovepress.com/article/338812)
Supplement: Supplementary file 1 [file get_supplementary_file.php]

**Suppl Figure 1**: Scheme of experiments 1 and 2. Animals were given four days to accustom to the climatic chamber in their home cages before implantation of intraabdominal transmitters. After five days of recovery, animals habituated for another 5 days to experimental cages equipped to measure food and water intake. All animals were injected twice with CyPPA or solvent on day 13 and 14 (ip). For experiment I, additional injection of LPS or PBS occurred on day 14 and animals were perfused for organ harvesting 24 h later (day 15). For experiment II, perfusion and organ harvesting was performed 2 h after the second CyPPA or solvent injection. The time of recording body temperature, locomotor activity and food and water intake are highlighted with green and orange arrows.


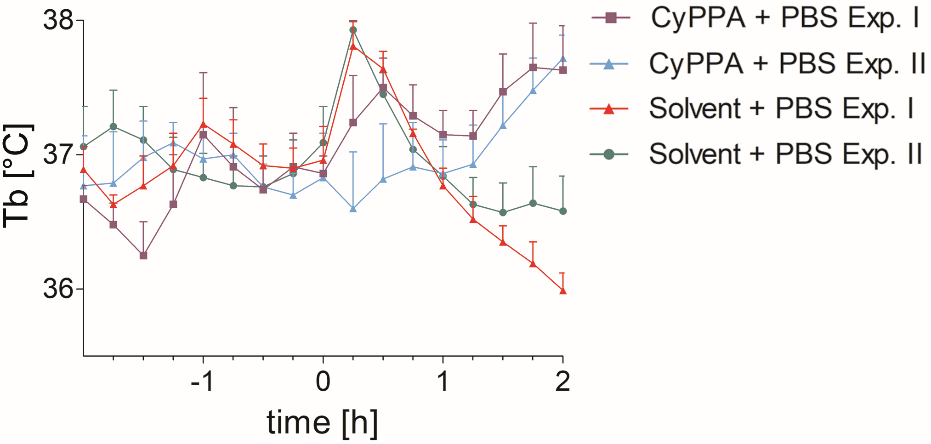


**Suppl Figure 2**: Comparison of early CyPPA action *in vivo* between experiments I and II at higher time resolution over two hours after CYPPA (15 mg/kg) versus solvent injection.n = 6 animals per group

**
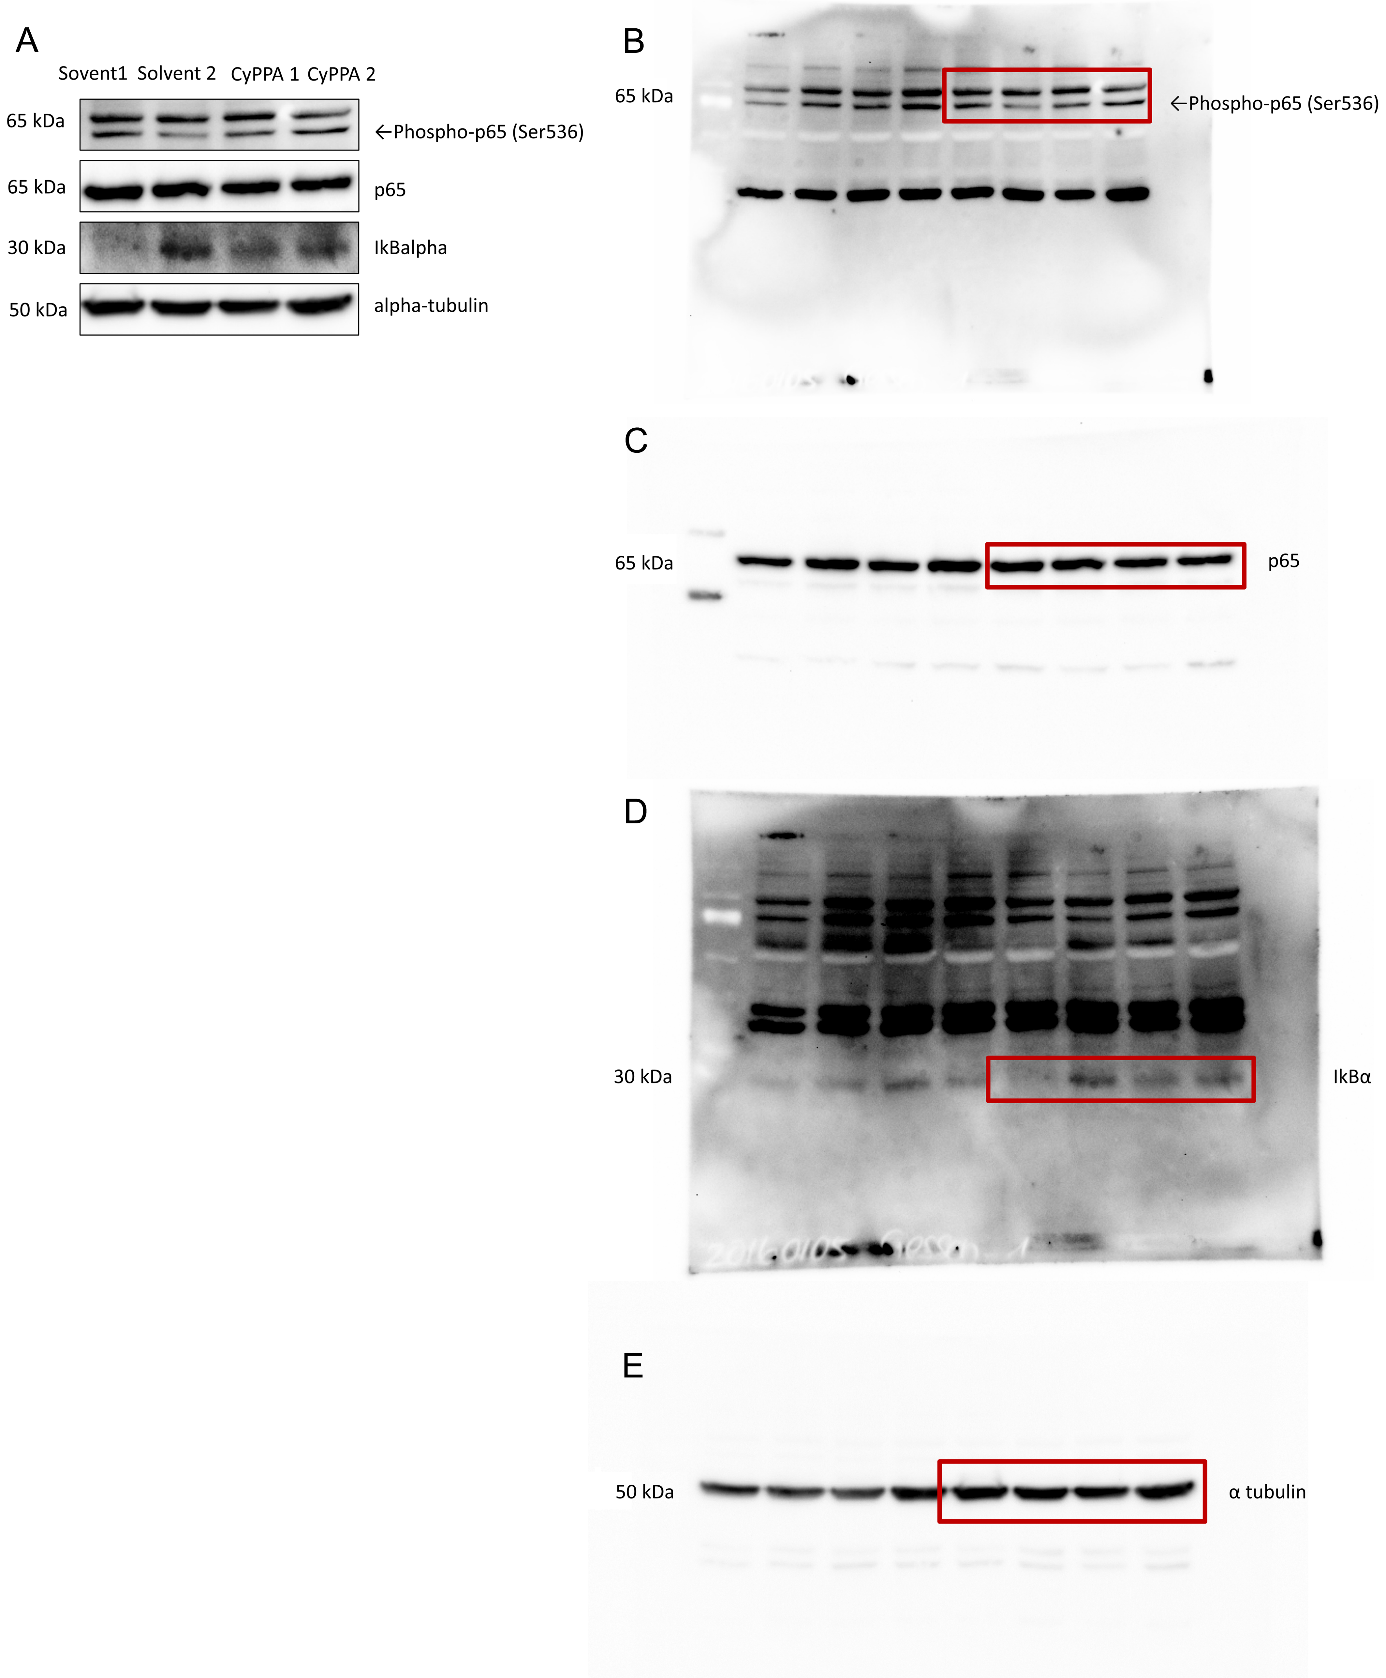
**

**Suppl Figure 3**: Entire western blot images of early CyPPA action on cortical NFκB signaling for cropped pictures shown in Figure 6; 2 h after CyPPA (15 mg/kg) or solvent treatment (A-E). Red boxes depict bands that have been cropped for illustration purposes in supple Figure 3A / Figure 6A.
